# Supplementary material for: Protein Arginine Methyltransferase 3 Enhances Chemoresistance in Pancreatic Cancer by Methylating hnRNPA1 to Increase ABCG2 Expression
Source: PubMed Central journal article supplement (PMC6356582; doi:10.3390/cancers11010008), 2018-12-20
Supplement: cancers-11-00008-s001.pdf [file cancers-11-00008-s001.pdf]

# Protein Arginine Methyltransferase 3 Enhances Chemoresistance in Pancreatic Cancer by Methylating hnRNPA1 to Increase ABCG2 Expression

Ming-Chuan Hsu, Mei-Ren Pan, Pei-Yi Chu, Ya-Li Tsai, Chia-Hua Tsai, Yan-Shen Shan, Li-Tzong Chen and Wen-Chun Hung

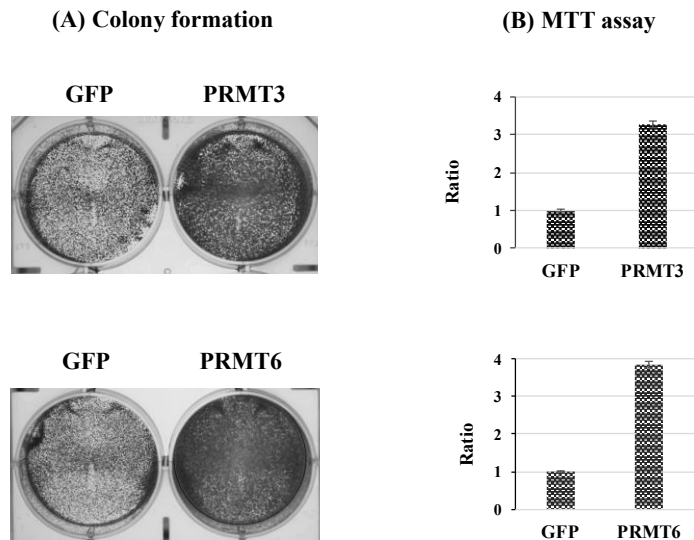

**Figure S1.** Overexpression of PRMT3 and PRMT6 facilitates cell proliferation. (A) GFP-, PRMT3- and PRMT6-overexpressing PANC-1 cells ( $1 \times 10^4$ ) were cultured for three days and the number of colonies was photographed. (B) GFP-, PRMT3- and PRMT6-overexpressing PANC-1 cells were cultured for three days and then the cell viability was measured by MTT assay. Error bars, SEM.  $n = 3$ .

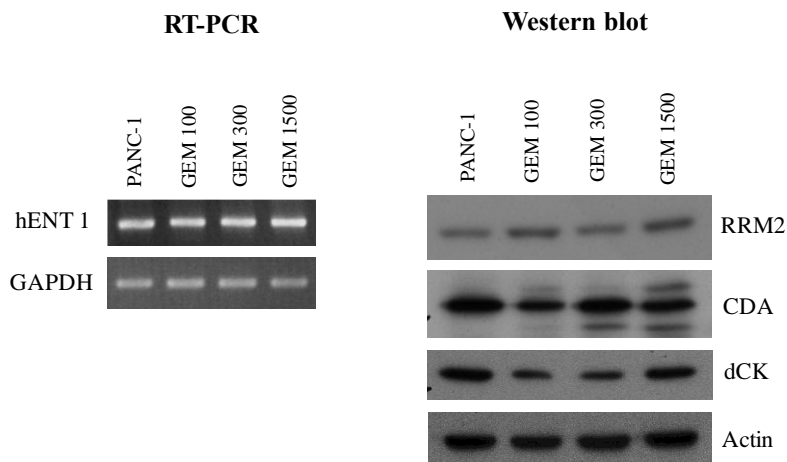

**Figure S2.** The expression of hENT1, RRM2, CDA and dCK was not altered in gemcitabine-resistant cell lines.



**Table S2.** Oligonucleotide sequences.

| <b>The Sequences of shRNA Plasmids</b>  |                                        |
|-----------------------------------------|----------------------------------------|
| sh-PRMT3#1                              | CGTGACCCTCACGTTGAATAA                  |
| sh-PRMT3#2                              | CCTGGGAGAAAGAAGAGAT                    |
| sh-PRMT3#3                              | CCTGTGGTATTAAGCATATA                   |
| sh-PRMT3#4                              | GCAGTGAGTGATGTGAATAAA                  |
| sh-hnRNP A1#D1                          | AGATATTTGTTGGTGGCATT                   |
| sh-hnRNP A1#G1                          | ACCCATGAAGGGAGGAAATTT                  |
| sh-hnRNP A1#H1                          | CAACAATCAGTCTTCAAATTT                  |
| sh-hnRNP A1#F2                          | AGATATTTGTTGGTGGCATT                   |
| <b>The Sequences of Primers (5'–3')</b> |                                        |
| PRMT3-F                                 | GCATGGTTCATAAACATGGACTT                |
| PRMT3-R                                 | CACCCAACATCCAAAACCTACC                 |
| PRMT6-F                                 | CCTGGGTATCCTTCGGAAC                    |
| PRMT6-R                                 | CTCCTTCAGCCACTTGGTTC                   |
| ABCG2-F                                 | ACTGAGATTGAGAGACGCGG                   |
| ABCG2-R                                 | TCTGGAGAGTTTTATCTTTTCAGC               |
| hnRNP A1-F                              | CCACGAAACCAAGGTGGCTA                   |
| hnRNP A1-R                              | CTGGCTCTCCTCTCCTGCTA                   |
| hnRNPA1-R31K-F                          | CAACTGATGAGAGCCTGAAGAGCCATTTGAGCAATGG  |
| hnRNPA1-R31K-R                          | CCATTGCTCAAAATGGCTCTTCAGGCTCTCATCAGTTG |
| hnRNPA1-R31F-F                          | CAACTGATGAGAGCCTGTTTAGCCATTTGAGCAATGG  |
| hnRNPA1-R31F-R                          | CCATTGCTCAAAATGGCTAAACAGGCTCTCATCAGTTG |
| 5'UTR (1-493)-F                         | (T7) GTCAGCGCTGCCTGAGCTCG              |
| 5'UTR (1-493)-R                         | GCCATTGGTGTTCCTTGTGACACTGGG            |
| 3'UTR (2462-4445)-F                     | (T7) CACGTGGCCTTGGCTTGTATG             |
| 3'UTR (2462-4445)-R                     | CTCTCTGTGTAATAAGGGAAGGG                |
| 5'UTR-N.C. (1-295)-F                    | (T7) GTCAGCGCTGCCTGAGCTCG              |
| 5'UTR-N.C. (1-295)-R                    | CCTAAATCCTACCCAGTTCCTCCAC              |
| 5'UTR-ARE1 (271-550)-F                  | (T7) GTGGAGGAACTGGGTAGGATTTAGG         |
| 5'UTR-ARE1 (271-550)-R                  | GCCATTGGTGTTCCTTGTGACACTGGG            |
| 3'UTR-ARE1 (2381-2573)-F                | (T7) CACGTGGCCTTGGCTTGTATG             |
| 3'UTR-ARE1 (2381-2573)-R                | GCAACAGTGTGATGGCAAGGG                  |
| 3'UTR-ARE2 (2553-2821)-F                | (T7) CCCTTGCCATCACACTGTTGC             |
| 3'UTR-ARE2 (2553-2821)-R                | GGGCTACTAACCTACCTATTC                  |
| 3'UTR-ARE3 (2801-3062)-F                | (T7) GAATAGGTAGGTTAGTAGCCC             |
| 3'UTR-ARE3 (2801-3062)-R                | CCAAACCCTCAGCCAAGATTCC                 |
| 3'UTR-ARE4 (3276-3585)-F                | (T7) CTGACCACTCCTGGATTTGG              |
| 3'UTR-ARE4 (3276-3585)-R                | GGAAGGAAGTAGTACTGGGAG                  |
| 3'UTR-ARE5 (4027-4331)-F                | (T7) GGGGCATCATGGTGTATAGACGCC          |
| 3'UTR-ARE5 (4027-4331)-R                | CTCTCTGTGTAATAAGGGAAGGG                |

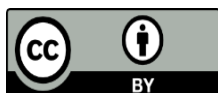

© 2018 by the authors. Licensee MDPI, Basel, Switzerland. This article is an open access article distributed under the terms and conditions of the Creative Commons Attribution (CC BY) license (<http://creativecommons.org/licenses/by/4.0/>).
